# Supplementary material for: Tungsten-Modulated Molybdenum Selenide/Graphene Heterostructure as an Advanced Electrode for All-Solid-State Supercapacitors
Source: Nanomaterials (Basel). 2021 Jun 2;11(6):1477. doi: 10.3390/nano11061477 (PMC8228879; doi:10.3390/nano11061477)
Supplement: Supplementary file 1 [file nanomaterials-11-01477-s001.zip › nanomaterials-1217782-SI.pdf]

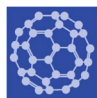

# Tungsten-Modulated Molybdenum Selenide/Graphene Heterostructure as an Advanced Electrode for All-Solid-State Supercapacitors

Qixian Liu <sup>1,2,3</sup>, Jing Ning <sup>1,2,3,\*</sup>, Haibin Guo <sup>1,2,3</sup>, Maoyang Xia <sup>1,2,3</sup>, Boyu Wang <sup>1,2,3</sup>, Xin Feng <sup>1,2,3</sup>, Dong Wang <sup>1,2,3</sup>, Jincheng Zhang <sup>1,2,3</sup> and Yue Hao <sup>1,2,3</sup>

<sup>1</sup> The State Key Discipline Laboratory of Wide Band Gap Semiconductor Technology, Xidian University, Xi'an 710071, China; lqx@stu.xidian.edu.cn (Q.L.); guohaibin0719@163.com (H.G.); maoyangxia@126.com (M.X.); wangbyxd@stu.xidian.edu.cn (B.W.); xfengk@126.com (X.F.); chankwang@xidian.edu.cn (D.W.); jchzhang@xidian.edu.cn (J.Z.); yhao@xidian.edu.cn (Y.H.)

<sup>2</sup> Shaanxi Joint Key Laboratory of Graphene, Xidian University, Xi'an 710071, China

<sup>3</sup> Xidian-Wuhu Research Institute, Wuhu 241000, China

\* Correspondence: ningj@xidian.edu.cn

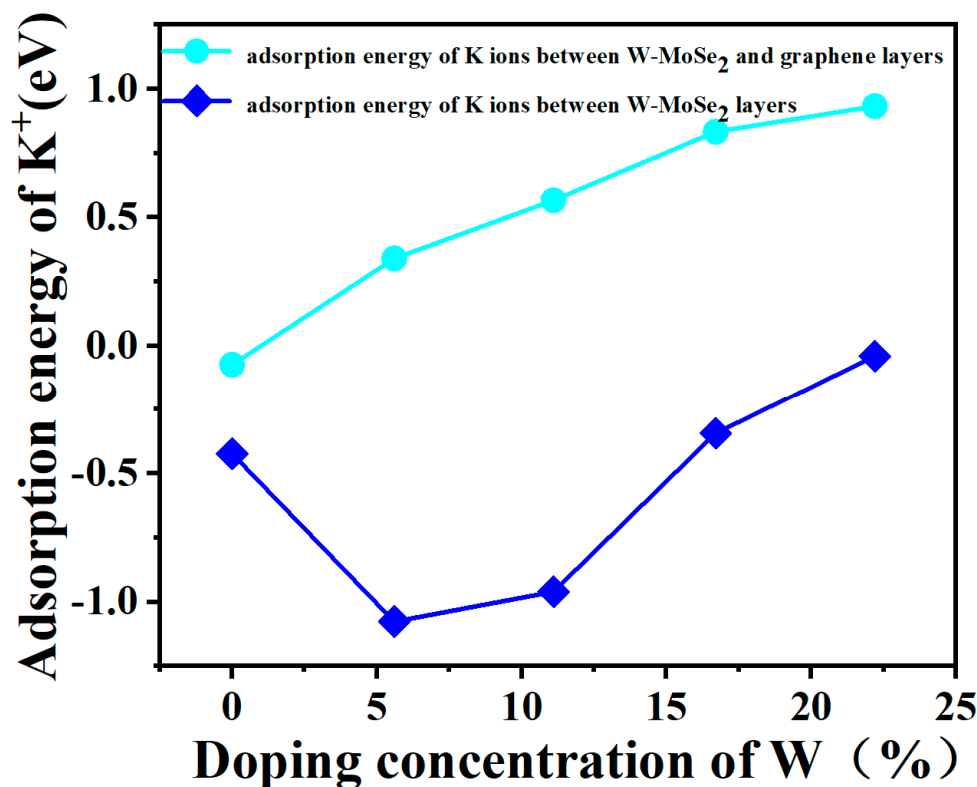

Figure S1. Adsorption energy of K ions under different doping concentrations.

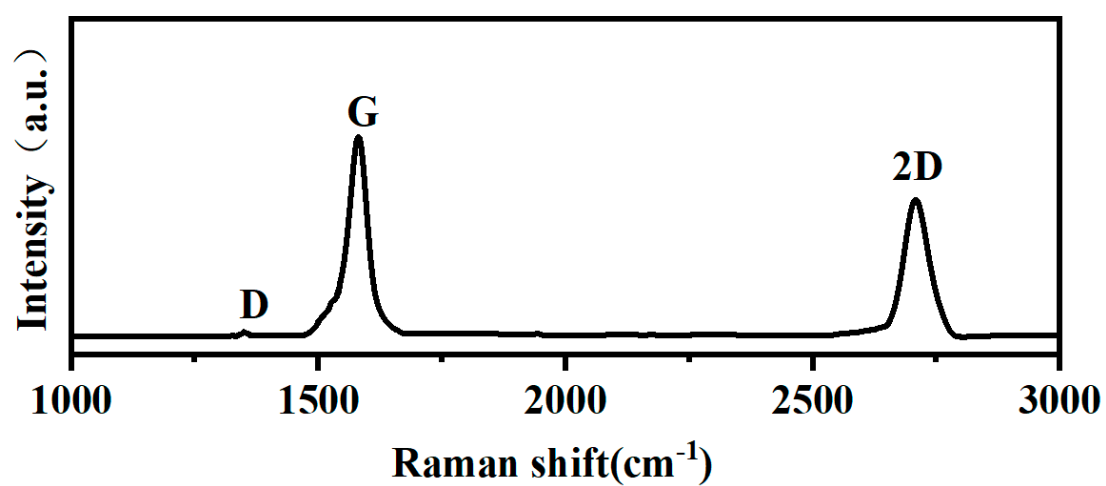

Figure S2. Raman spectra of graphene.

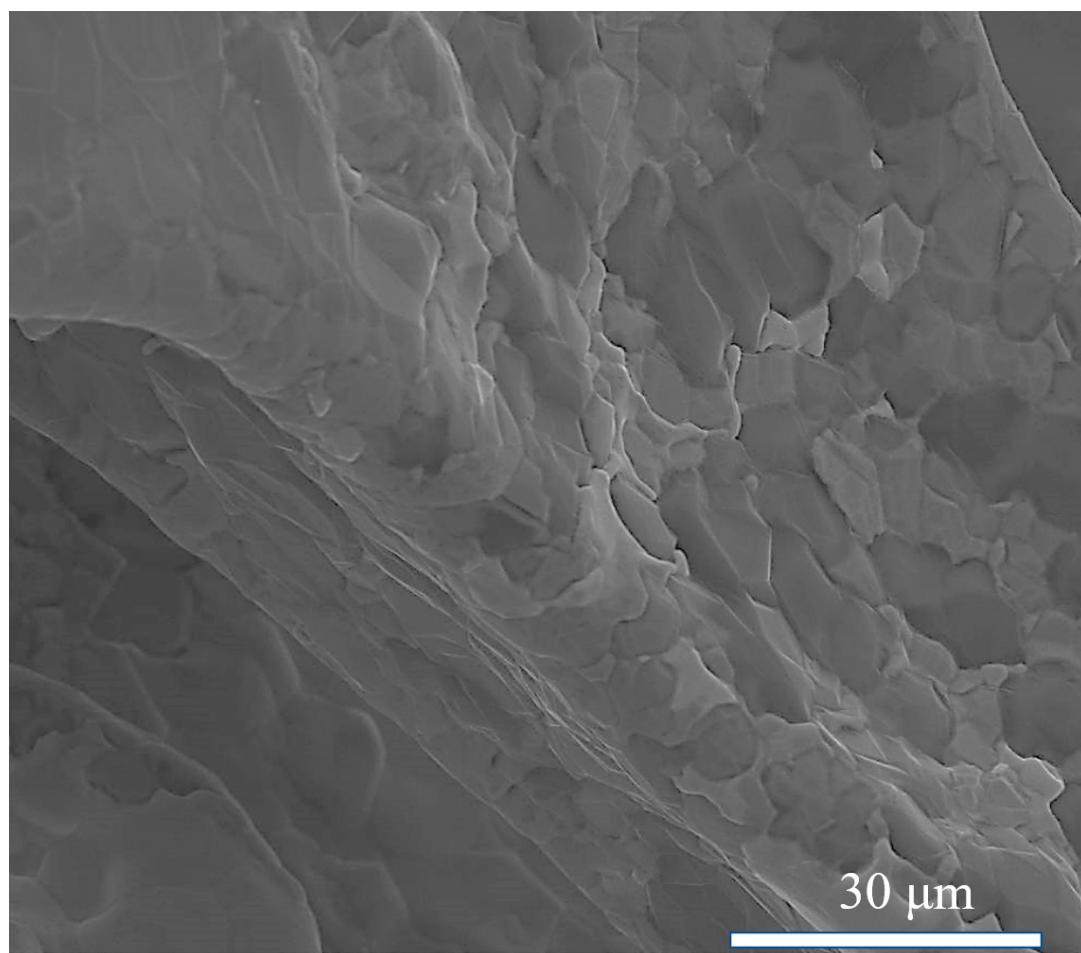

Figure S3. SEM image of graphene.

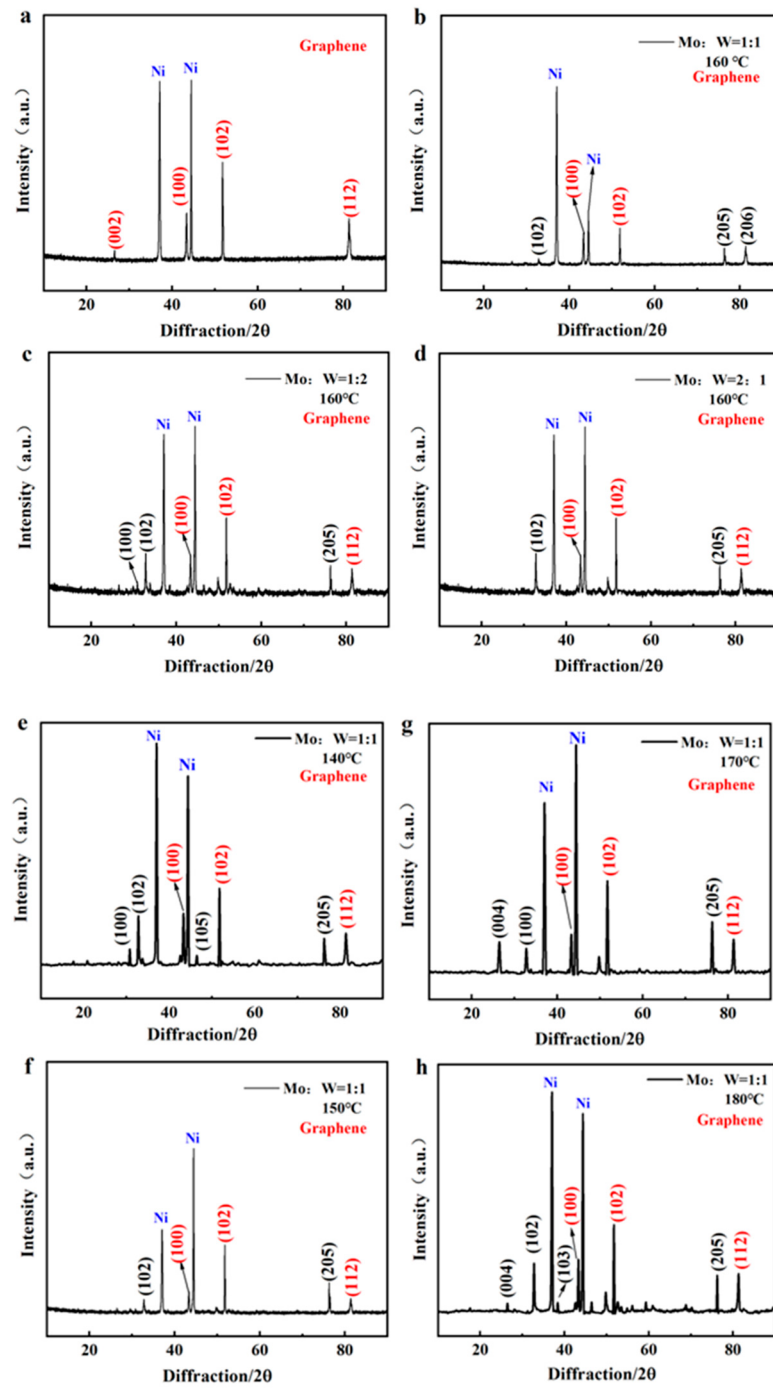

**Figure S4.** (a) XRD spectrum of Graphene/Ni foam, (b) XRD spectrum of Mo:W = 1:1, (c) XRD spectrum of Mo:W = 1:2, (d) XRD spectrum of Mo:W = 2:1, (e) XRD spectrum of sample grown at 140 °C, (f) XRD spectrum of sample grown at 150 °C, (g) XRD spectrum of sample grown at 170 °C, (h) XRD spectrum of sample grown at 180 °C.

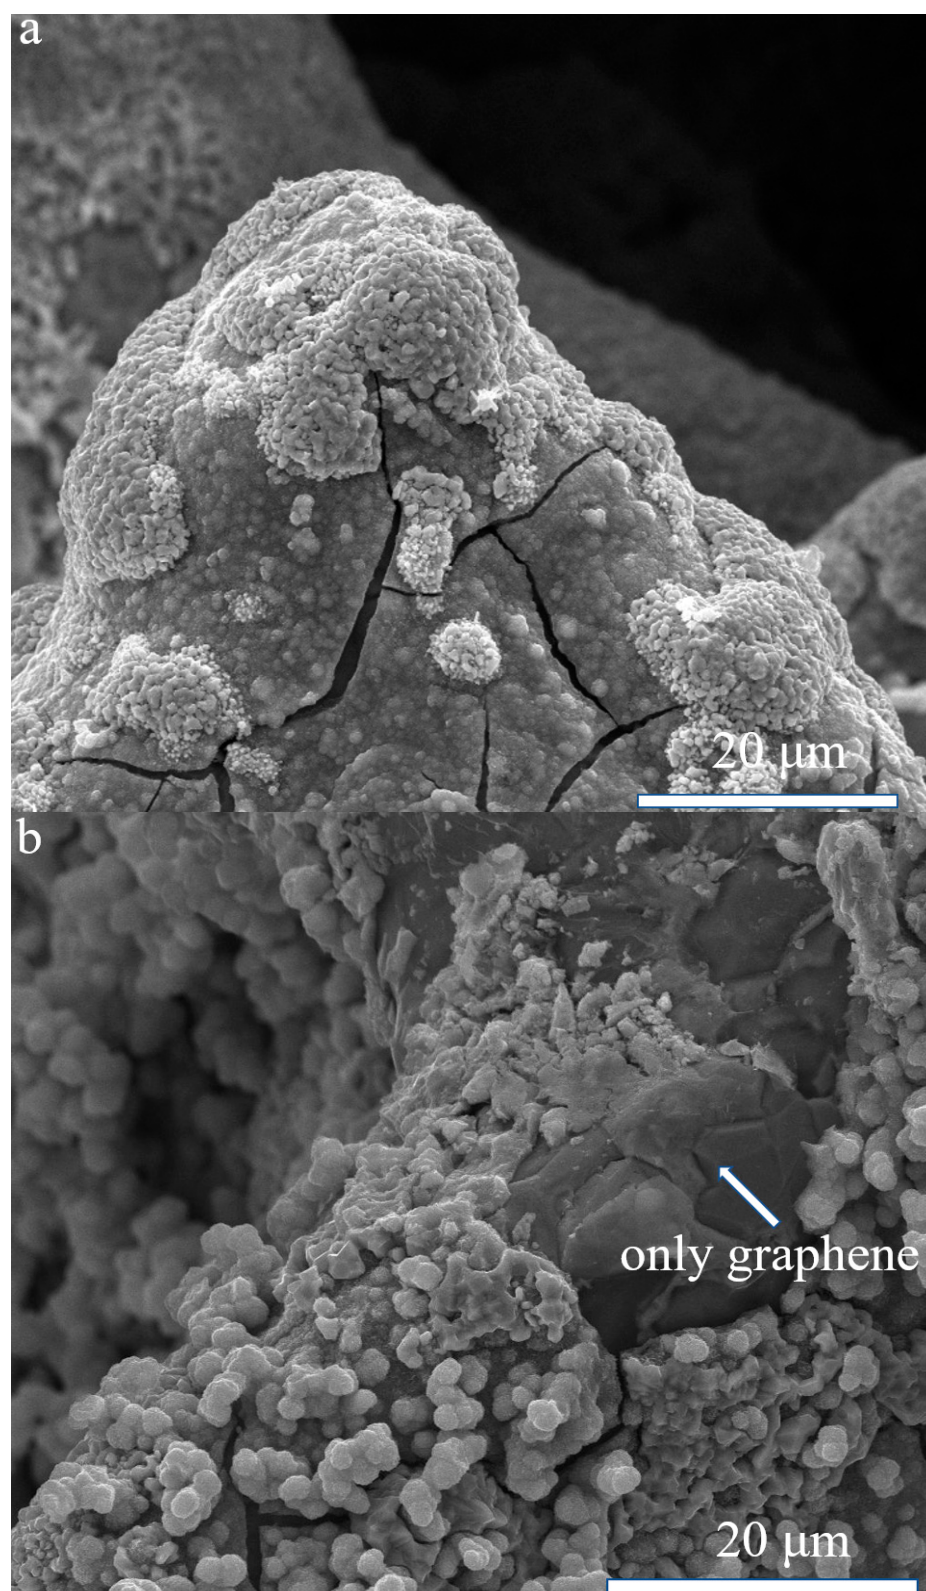

**Figure S5.** (a) SEM image of device after 5000 cycles, (b) The active material falls off and part of the graphene area is exposed after 5000 cycles.
